# Supplementary material for: Proteomic landscape of liver tissue in old male mice that are long-term treated with polysaccharides fromSargassum fusiforme
Source: Royal Society of Chemistry journal article supplement (doi:10.1039/d0fo00187b), 2020-01-01
Supplement: d0fo00187b3.pdf [file d0fo00187b3.pdf]

Table 1 Sequences of the primers

| <b>Gene</b> | <b>No. in NCBI</b> | <b>Sequence</b>                                       |
|-------------|--------------------|-------------------------------------------------------|
| Uqcrcl      | NM_025407          | F: CTGGAAACTCTGGCAAAGCT<br>R: AAGGATGTTTTTGCCCCGAG    |
| Aco2        | NM_080633          | F: ATCTCCAATCACCACCCACC<br>R: TGGGTCTCGTTGAAGGTGTG    |
| Enol        | NC_007255.2        | F: CGCTTAGGGTTGGTCACTGT<br>R: GGTCTGCGATGAAAGTGTCC    |
| ATP5b       | NM_016774          | F: GGATAGATGCCCAACTCAGC<br>R: ACGGCTTCTTCAATGGGTCC    |
| ATP5h       | NM_025313          | F: TTGAGTCTTGTGGGGCGTGT<br>R: ATTTGGGGGAGAGCACGGTC    |
| Actin       | M12866             | F: CGTGGGCCGCCCTAGGCACCA<br>R: TTGGCCTTAGGGTTCAGGGGGG |
