# Supplementary figures and images for: Proteomic landscape of liver tissue in old male mice that are long-term treated with polysaccharides fromSargassum fusiforme
Source: Royal Society of Chemistry journal article supplement (doi:10.1039/d0fo00187b), 2020-01-01

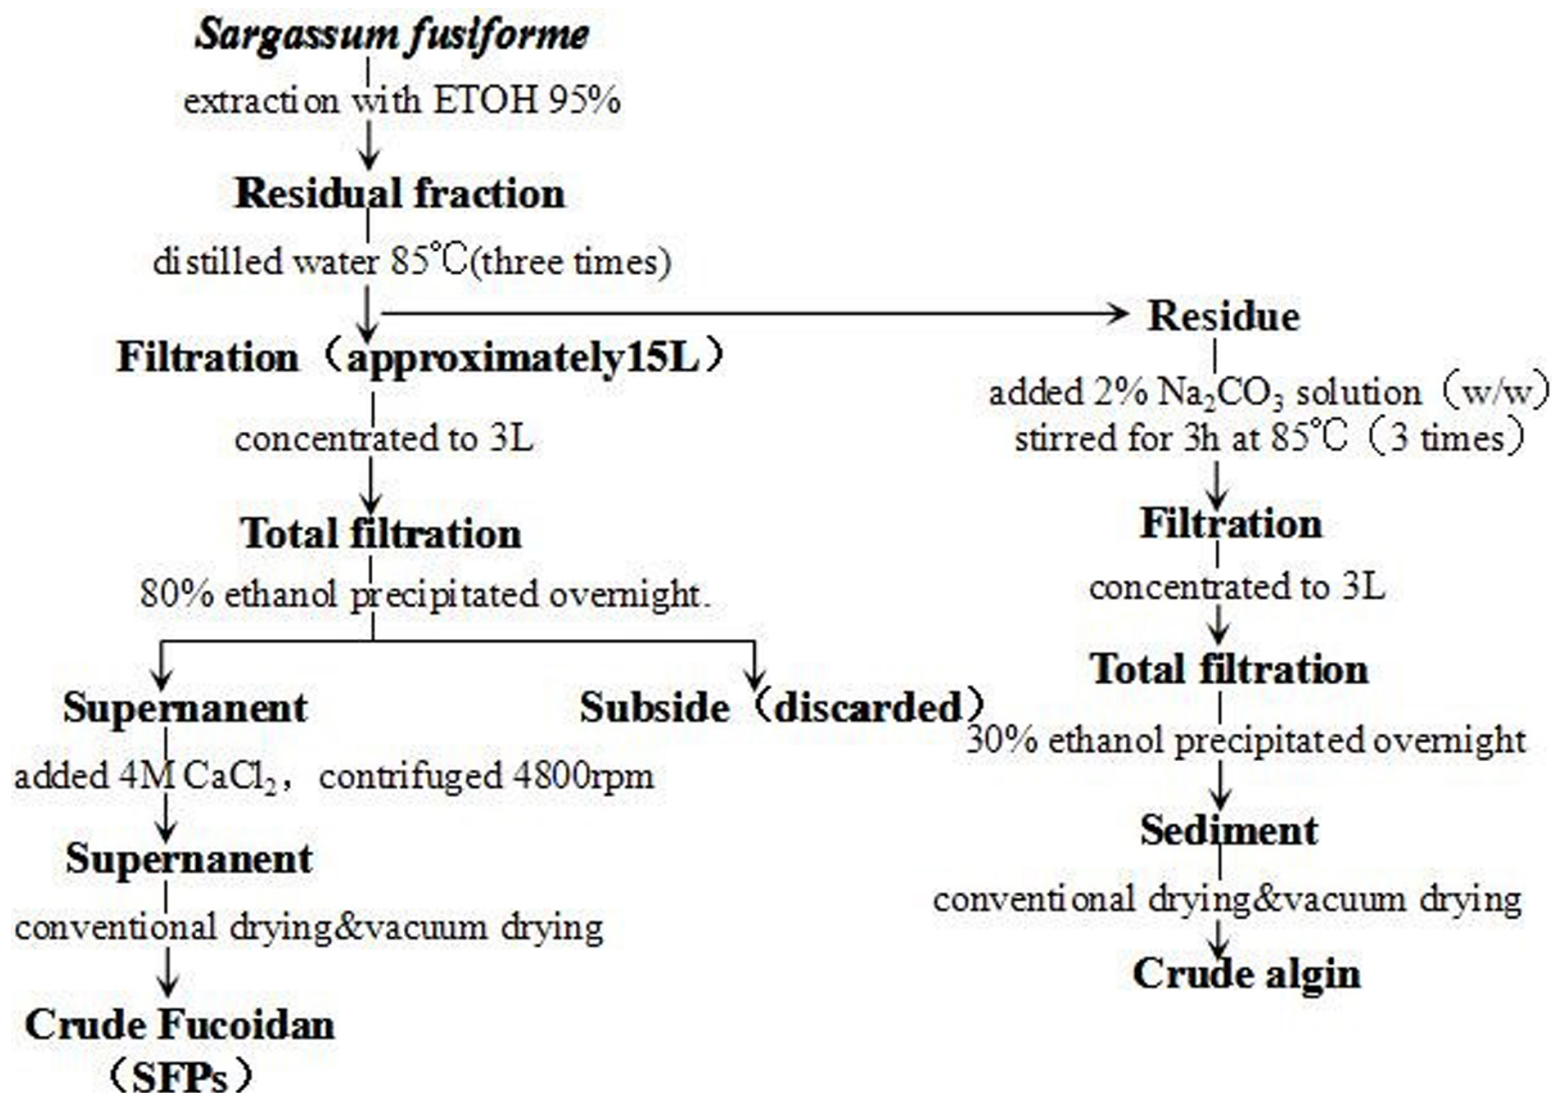

Supplement: d0fo00187b1.pdf [file d0fo00187b1.pdf]

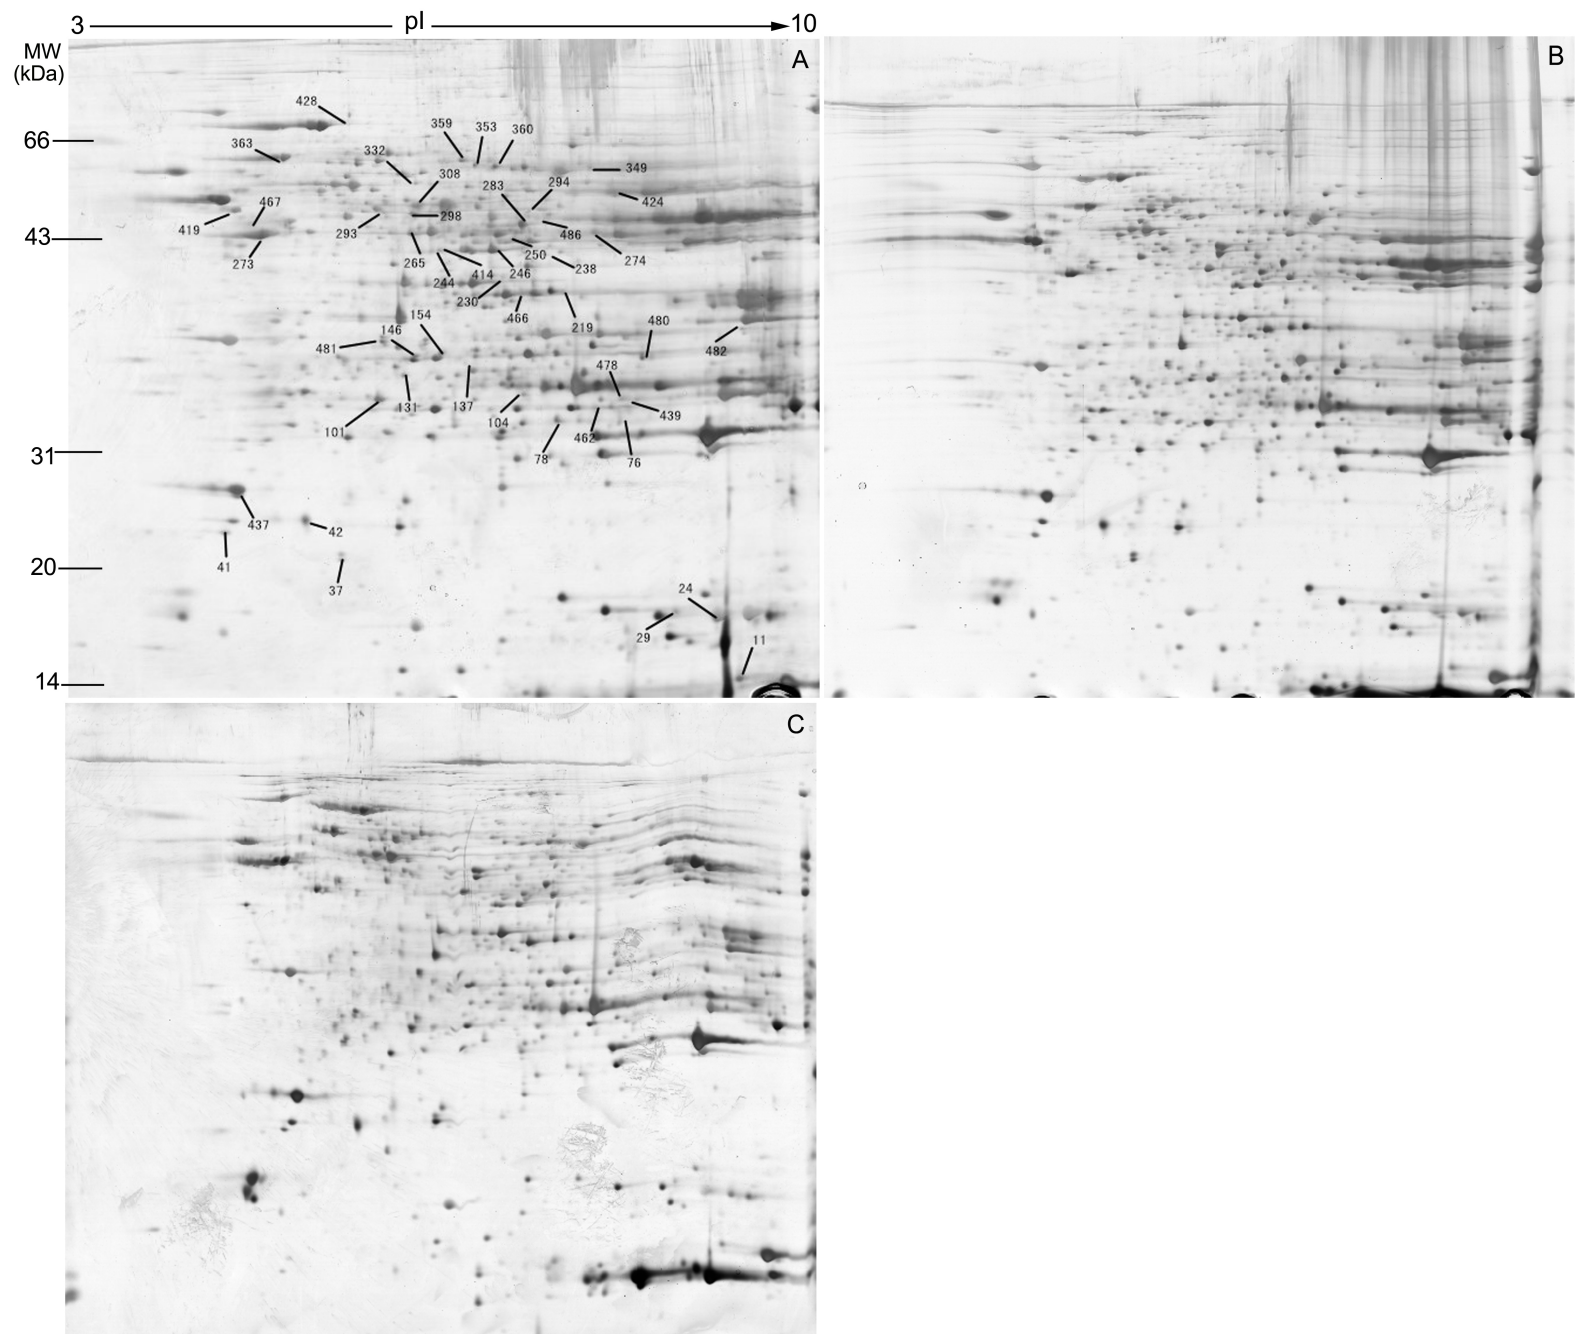

Supplement: d0fo00187b2.pdf [file d0fo00187b2.pdf]
